# Supplementary material for: Serious Safety Signals and Prediction Features Following COVID-19 mRNA Vaccines Using the Vaccine Adverse Event Reporting System
Source: MDPI journal article supplement (doi:10.3390/ph17030356), 2024-03-10
Supplement: s1 [file s1]

# Serious Safety Signals and Prediction Features Following COVID-19 mRNA Vaccines Using the Vaccine Adverse Event Reporting System

## Supplementary Appendix

### Table of contents

|                                                                                                                                                   |    |
|---------------------------------------------------------------------------------------------------------------------------------------------------|----|
| Figure S1. Selection of Individual case safety reports.....                                                                                       | 2  |
| Figure S2. Selection of adverse events following immunization. ....                                                                               | 3  |
| Table S1. Definition and criteria of disproportionality analysis for signal detection.....                                                        | 4  |
| Table S2. List of highly reported patient medical history in VAERS. ....                                                                          | 5  |
| Table S3. Clinical consequences of serious ICSRs after mRNA-based COVID-19 vaccination (n=555,033).6                                              |    |
| Table S4. Percentage changes between serious AEFIs and non-serious AEFIs by SOC after mRNA-based COVID-19 vaccination. ....                       | 7  |
| Table S5. Signals detected from adverse events after administration of Pfizer-BioNTech (BNT162b2).....                                            | 8  |
| Table S6. Signals detected in adverse events after administration of Moderna (mRNA-1273).....                                                     | 13 |
| Table S7. Signals detected from serious adverse events after administration of Pfizer-BioNTech (BNT162b2).....                                    | 16 |
| Table S8. Signals detected from serious adverse events after administration of Moderna (mRNA-1273).....                                           | 17 |
| Table S9. Area under the receiver operating characteristic curve (AUROC) with various numbers of selected features in major signals of AEFIs..... | 18 |

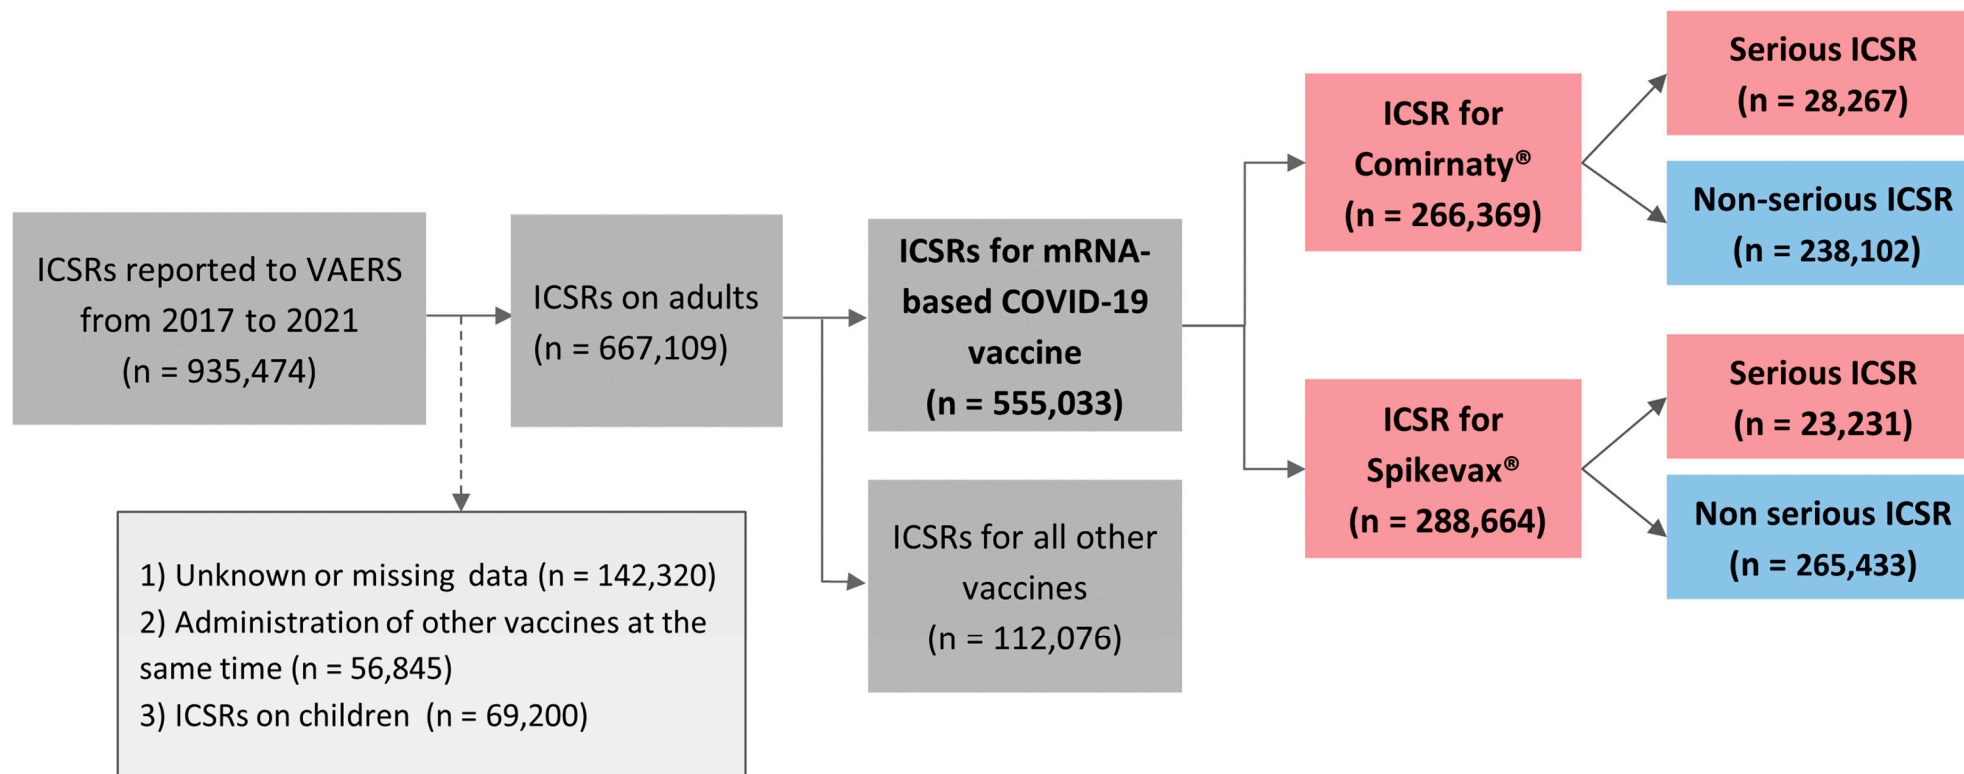

**Figure S1. Selection of Individual case safety reports.**

COVID-19: corona virus infectious disease-19; ICSR: individual case safety report; VAERS: vaccine adverse event reporting system

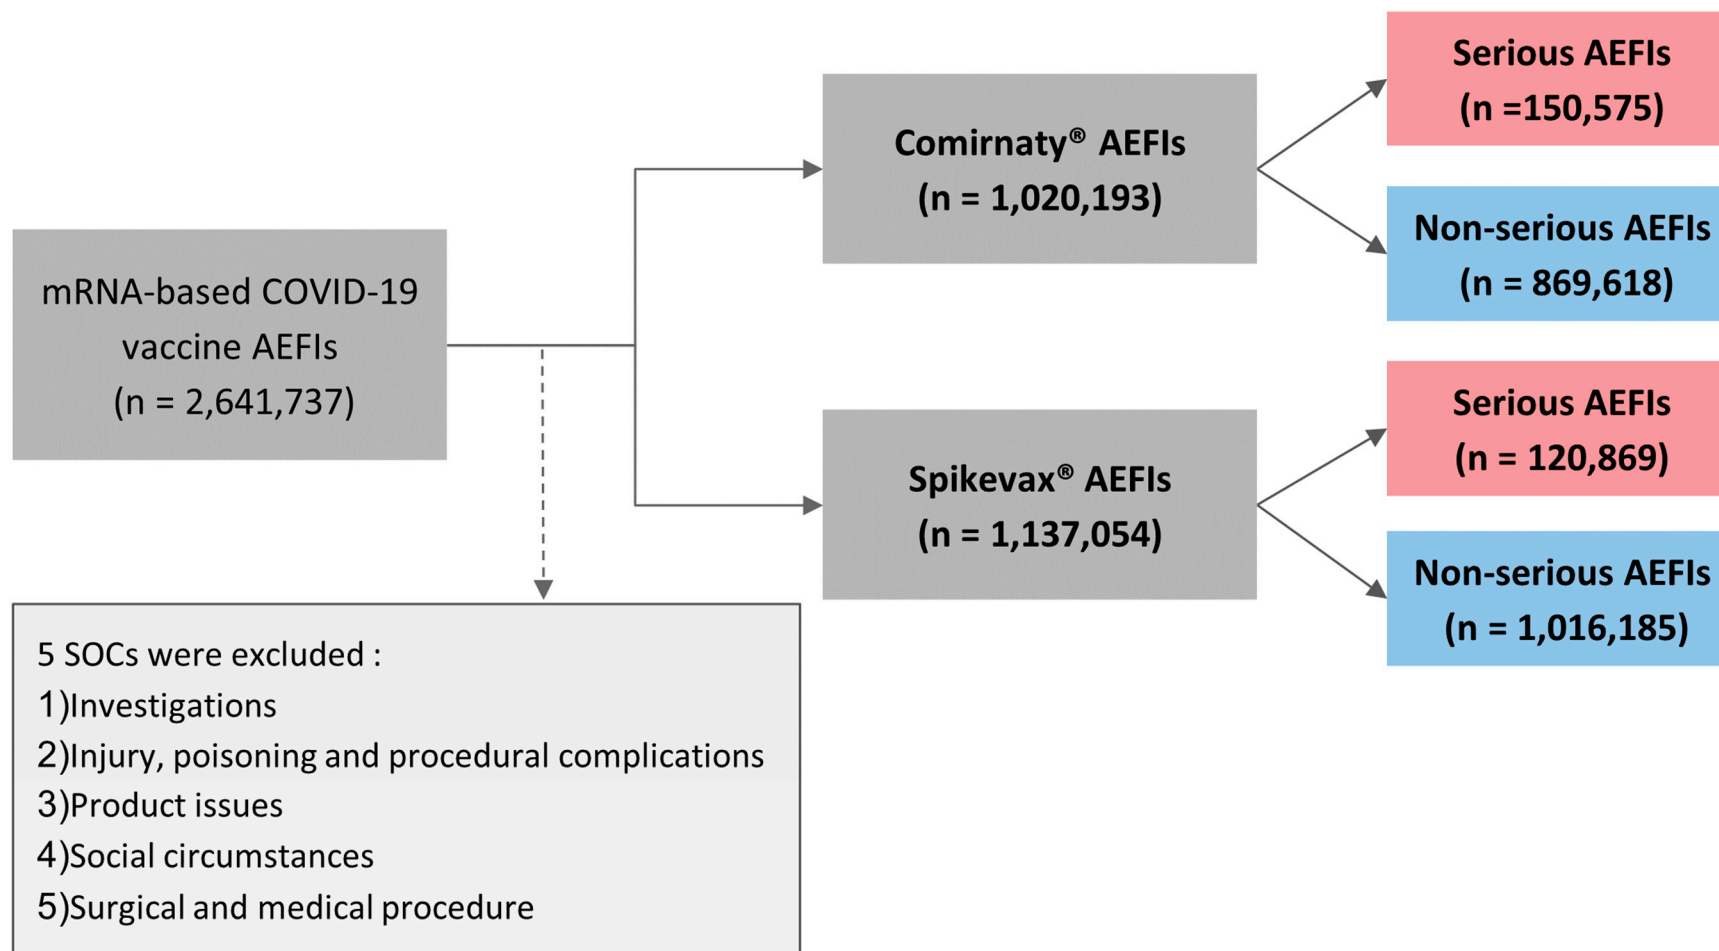

**Figure S2. Selection of adverse events following immunization.**

AEFI: adverse events after immunization; COVID-19: corona virus infectious disease-19; SOC: system organ class

**Table S1. Definition and criteria of disproportionality analysis for signal detection.**

| Number of reports   | A specific AE | All other AEs |
|---------------------|---------------|---------------|
| Target mRNA vaccine | A             | B             |
| All other vaccines  | C             | D             |

AE = adverse event

| Measures | Calculation                                                             | Criteria as signal                    |
|----------|-------------------------------------------------------------------------|---------------------------------------|
| PRR      | $PRR = (A / (A + B)) / (C / (C + D))$                                   | $PRR \geq 2, \chi^2 \geq 4, N \geq 3$ |
| ROR      | $ROR = (A / B) / (C / D)$                                               | lower limit of 95% CI >1, $N \geq 3$  |
| BCPNN    | $IC = \log_2 \frac{P(AE, Drug)}{P(AE)P(Drug)}$                          | Lower limit of 95% CI $\geq 0$        |
|          | $95\% \text{ CI} = E(IC) \pm 2V(IC)^{0.5}$                              |                                       |
| MGPS     | $EBGM = A(A+B+C+D)/(A+C)/(A+B)$                                         | Lower limit of 95% CI >1              |
|          | $95\% \text{ CI} = e^{\ln(EBGM) \pm 1.96(1/A + 1/B + 1/C + 1/D)^{0.5}}$ |                                       |

AE: adverse event; PRR: proportional reporting ratio; ROR: reporting odd ratio; MGPS: multi-item Gamma Poisson shrinker; BCPNN: Bayesian confidence propagation neural network, IC: information component; EBGM = empirical Bayesian geometric mean; A: The number of a specific adverse event after each mRNA vaccine; B: The number of other adverse events after each mRNA vaccine; C: The number of a specific adverse event after all other vaccines; D: The number of other adverse events after all other vaccines;  $\chi^2$  = chi-square

**Table S2. List of highly reported patient medical history in VAERS.**

|    | <b>Disease</b>                                                      |
|----|---------------------------------------------------------------------|
| 1  | Acute kidney injury                                                 |
| 2  | Anaemia                                                             |
| 3  | Aneurysm                                                            |
| 4  | Anxiety                                                             |
| 5  | Arrhythmia                                                          |
| 6  | Arthritis                                                           |
| 7  | Asthma                                                              |
| 8  | Benign prostatic hyperplasia                                        |
| 9  | Cerebrovascular accident                                            |
| 10 | Chronic kidney disease                                              |
| 11 | Chronic obstructive pulmonary disease                               |
| 12 | Coronary artery disease                                             |
| 13 | Crohn's disease                                                     |
| 14 | Deep vein thrombosis or Pulmonary embolism                          |
| 15 | Dementia                                                            |
| 16 | Depression                                                          |
| 17 | Fibromyalgia                                                        |
| 18 | Gastrooesophageal reflux disease                                    |
| 19 | Heart failure                                                       |
| 20 | Hepatobiliary disorders                                             |
| 21 | Hyperlipidemia                                                      |
| 22 | Hypertension                                                        |
| 23 | Hyperthyroidism                                                     |
| 24 | Hypothyroidism                                                      |
| 25 | Irritable bowel syndrome                                            |
| 26 | Migraine                                                            |
| 27 | Multiple sclerosis                                                  |
| 28 | Myocardial infarction                                               |
| 29 | Neoplasms benign, malignant and unspecified (incl cysts and polyps) |
| 30 | Osteoporosis                                                        |
| 31 | Polycystic ovaries                                                  |
| 32 | Pulmonary hypertension                                              |
| 33 | Seizure                                                             |
| 34 | Sleep apnoea syndrome                                               |
| 35 | Type 1 diabetes mellitus                                            |
| 36 | Type 2 diabetes mellitus                                            |

**Table S3. Clinical consequences of serious ICSRs after mRNA-based COVID-19 vaccination (n=555,033).**

| Category                |                                    | Pfizer-BioNTech (BNT162b2) |        | Moderna (mRNA-1273) |        | P-value |
|-------------------------|------------------------------------|----------------------------|--------|---------------------|--------|---------|
|                         |                                    | n                          | %      | n                   | %      |         |
| ICSRs                   |                                    | 266,369                    | 100.00 | 288,664             | 100.00 | p<.0000 |
| Non-serious ICSRs       |                                    | 238,102                    | 89.39  | 265,433             | 91.95  |         |
| Serious ICSRs           |                                    | 28,267                     | 10.61  | 23,231              | 8.05   |         |
|                         | Type of serious ICSRs <sup>†</sup> |                            |        |                     |        | p<.0000 |
| Death                   |                                    | 3,924                      | 1.47   | 3,840               | 1.33   |         |
| Life-threatening        |                                    | 4,899                      | 1.84   | 4,118               | 1.43   |         |
| Hospitalized/ prolonged |                                    | 21,073                     | 7.91   | 17,121              | 5.93   |         |
| Disability              |                                    | 5,605                      | 2.10   | 4,140               | 1.43   |         |
| AEFIs                   |                                    | 1,020,193                  | 100.00 | 1,137,054           | 100.00 | p<.0000 |
| Non-serious AEFIs       |                                    | 869,618                    | 85.24  | 1,016,185           | 89.37  |         |
| Serious AEFIs           |                                    | 150,575                    | 14.76  | 120,869             | 10.63  |         |

ICSR= individual case safety report; AEFI=adverse events after immunization

†: A report may meet more than one criterion for classification as type of seriousness

**Table S4. Percentage changes between serious AEFIs and non-serious AEFIs by SOC after mRNA-based COVID-19 vaccination.**

| SOC                                                                    | Pfizer-BioNTech (BNT162b2)         |             |                                |              | Change     | Moderna (mRNA-1273)                  |             |                                |             | Change     |
|------------------------------------------------------------------------|------------------------------------|-------------|--------------------------------|--------------|------------|--------------------------------------|-------------|--------------------------------|-------------|------------|
|                                                                        | Non-serious AEFIs<br>(n = 869,618) |             | Serious AEFIs<br>(n = 150,575) |              |            | Non-serious AEFIs<br>(n = 1,016,185) |             | Serious AEFIs<br>(n = 120,869) |             |            |
|                                                                        | n                                  | %           | n                              | %            |            | n                                    | %           | n                              | %           |            |
| Hepatobiliary disorders                                                | 289                                | 0.03        | 642                            | 0.43         | 1183       | 267                                  | 0.03        | 555                            | 0.46        | 1648       |
| Neoplasms benign, malignant and unspecified<br>(incl cysts and polyps) | 438                                | 0.05        | 561                            | 0.37         | 640        | 412                                  | 0.04        | 429                            | 0.35        | 775        |
| <b>Renal and urinary disorders</b>                                     | <b>2,224</b>                       | <b>0.26</b> | <b>2,527</b>                   | <b>1.68</b>  | <b>556</b> | <b>2,436</b>                         | <b>0.24</b> | <b>1,895</b>                   | <b>1.57</b> | <b>554</b> |
| Congenital, familial and genetic disorders                             | 143                                | 0.02        | 145                            | 0.10         | 486        | 127                                  | 0.01        | 110                            | 0.09        | 628        |
| <b>Infections and infestations</b>                                     | <b>22,146</b>                      | <b>2.55</b> | <b>16,898</b>                  | <b>11.22</b> | <b>341</b> | <b>17,988</b>                        | <b>1.77</b> | <b>11,406</b>                  | <b>9.44</b> | <b>433</b> |
| <b>Cardiac disorders</b>                                               | <b>13,991</b>                      | <b>1.61</b> | <b>9,053</b>                   | <b>6.01</b>  | <b>274</b> | <b>11,083</b>                        | <b>1.09</b> | <b>7,530</b>                   | <b>6.23</b> | <b>471</b> |
| Pregnancy, puerperium and perinatal conditions                         | 1,052                              | 0.12        | 675                            | 0.45         | 271        | 737                                  | 0.07        | 366                            | 0.30        | 318        |
| Metabolism and nutrition disorders                                     | 5,993                              | 0.69        | 3,456                          | 2.30         | 233        | 7,297                                | 0.72        | 2,710                          | 2.24        | 212        |
| Endocrine disorders                                                    | 563                                | 0.06        | 241                            | 0.16         | 147        | 399                                  | 0.04        | 173                            | 0.14        | 265        |
| Respiratory, thoracic and mediastinal disorders                        | 56,750                             | 6.53        | 22,109                         | 14.68        | 125        | 44,420                               | 4.37        | 16,532                         | 13.68       | 213        |
| Vascular disorders                                                     | 15,342                             | 1.76        | 4,185                          | 2.78         | 58         | 12,665                               | 1.25        | 3,566                          | 2.95        | 137        |
| Immune system disorders                                                | 3,413                              | 0.39        | 759                            | 0.50         | 28         | 2,837                                | 0.28        | 527                            | 0.44        | 56         |
| Psychiatric disorders                                                  | 19,630                             | 2.26        | 4,063                          | 2.70         | 20         | 18,683                               | 1.84        | 3,404                          | 2.82        | 53         |
| Ear and labyrinth disorders                                            | 15,604                             | 1.79        | 2,399                          | 1.59         | -11        | 12,326                               | 1.21        | 1,747                          | 1.45        | 19         |
| Eye disorders                                                          | 15,851                             | 1.82        | 2,355                          | 1.56         | -14        | 13,260                               | 1.30        | 1,975                          | 1.63        | 25         |
| Nervous system disorders                                               | 153,620                            | 17.67       | 21,790                         | 14.47        | -18        | 144,354                              | 14.21       | 17,961                         | 14.86       | 5          |
| Blood and lymphatic system disorders                                   | 14,300                             | 1.64        | 1,983                          | 1.32         | -20        | 11,179                               | 1.10        | 1,586                          | 1.31        | 19         |
| Gastrointestinal disorders                                             | 77,817                             | 8.95        | 10,455                         | 6.94         | -22        | 77,148                               | 7.59        | 8,446                          | 6.99        | -8         |
| General disorders and administration site conditions                   | 273,959                            | 31.50       | 32,699                         | 21.72        | -31        | 418,866                              | 41.22       | 28,450                         | 23.54       | -43        |
| Musculoskeletal and connective tissue disorders                        | 90,784                             | 10.44       | 9,463                          | 6.28         | -40        | 104,338                              | 10.27       | 7,679                          | 6.35        | -38        |
| Skin and subcutaneous tissue disorders                                 | 71,119                             | 8.18        | 3,419                          | 2.27         | -72        | 106,550                              | 10.49       | 3,356                          | 2.78        | -74        |
| Reproductive system and breast disorders                               | 14,590                             | 1.68        | 698                            | 0.46         | -72        | 8,813                                | 0.87        | 466                            | 0.39        | -56        |

AEFI: adverse events after immunization; SOC :system organ class.

Change (%) was calculated by subtracting proportion of non-serious AEFIs from proportion of serious AEFIs and dividing it by proportion of non-serious AEFIs.

Table S5. Signals detected from adverse events after administration of Pfizer-BioNTech (BNT162b2).

| SOC                                  | PT (n = 201)                   | Count  | PRR   | ROR          | IC <sub>LB</sub> | EBGM <sub>LB</sub> |
|--------------------------------------|--------------------------------|--------|-------|--------------|------------------|--------------------|
| Blood and lymphatic system disorders | Lymphadenopathy                | 11,189 | 3.65  | 3.68         | 0.34             | 1.28               |
|                                      | Thrombocytopenia               | 354    | 3.04  | 3.04         | 0.13             | 1.16               |
|                                      | Lymph node pain                | 2,621  | 3.01  | 3.02         | 0.27             | 1.23               |
| Cardiac disorders                    | Acute myocardial infarction    | 485    | 12.48 | <b>12.49</b> | 0.31             | 1.30               |
|                                      | Coronary artery occlusion      | 91     | 10.54 | <b>10.54</b> | 0.05             | 1.16               |
|                                      | Cardiac flutter                | 649    | 8.59  | 8.60         | 0.32             | 1.30               |
|                                      | Cardiomegaly                   | 295    | 8.54  | 8.54         | 0.24             | 1.25               |
|                                      | Atrial flutter                 | 122    | 8.07  | 8.08         | 0.10             | 1.18               |
|                                      | Supraventricular extrasystoles | 130    | 7.53  | 7.53         | 0.10             | 1.18               |
|                                      | Cardiomyopathy                 | 106    | 7.02  | 7.02         | 0.06             | 1.15               |
|                                      | Angina pectoris                | 542    | 6.98  | 6.98         | 0.28             | 1.27               |
|                                      | Cardiac disorder               | 416    | 6.42  | 6.43         | 0.25             | 1.25               |
|                                      | Myocardial infarction          | 660    | 6.00  | 6.00         | 0.29             | 1.27               |
|                                      | Extrasystoles                  | 265    | 5.85  | 5.85         | 0.19             | 1.22               |
|                                      | Cardiac failure congestive     | 331    | 5.68  | 5.68         | 0.21             | 1.23               |
|                                      | Supraventricular tachycardia   | 229    | 5.58  | 5.59         | 0.17             | 1.20               |
|                                      | Cardiac failure                | 212    | 5.17  | 5.17         | 0.15             | 1.19               |
|                                      | Ventricular extrasystoles      | 442    | 5.12  | 5.12         | 0.23             | 1.24               |
|                                      | Sinus tachycardia              | 278    | 4.95  | 4.95         | 0.18             | 1.20               |
|                                      | Cardiac discomfort             | 147    | 4.86  | 4.87         | 0.08             | 1.15               |
|                                      | Cardiac arrest                 | 523    | 4.66  | 4.66         | 0.24             | 1.23               |
|                                      | Atrial fibrillation            | 1,307  | 4.36  | 4.36         | 0.29             | 1.26               |
|                                      | Pericarditis                   | 866    | 4.31  | 4.32         | 0.27             | 1.25               |
|                                      | Pericardial effusion           | 288    | 4.30  | 4.31         | 0.17             | 1.19               |
|                                      | Myocarditis                    | 962    | 3.98  | 3.98         | 0.26             | 1.24               |
|                                      | Cardio-respiratory arrest      | 145    | 3.95  | 3.95         | 0.05             | 1.13               |
|                                      | Bradycardia                    | 353    | 3.89  | 3.90         | 0.18             | 1.19               |
|                                      | Palpitations                   | 7,137  | 3.84  | 3.87         | 0.34             | 1.28               |
|                                      | Arrhythmia                     | 512    | 3.71  | 3.71         | 0.20             | 1.21               |
|                                      | Tachycardia                    | 2,908  | 3.57  | 3.58         | 0.30             | 1.26               |
| Ear and labyrinth disorders          | Ear discomfort                 | 1,372  | 4.30  | 4.30         | 0.29             | 1.26               |
|                                      | Tinnitus                       | 6,935  | 4.23  | 4.25         | 0.35             | 1.29               |
|                                      | Vertigo                        | 3,796  | 2.63  | 2.64         | 0.25             | 1.21               |
|                                      | Hypoacusis                     | 693    | 2.57  | 2.57         | 0.16             | 1.16               |
|                                      | Hyperacusis                    | 334    | 2.34  | 2.35         | 0.07             | 1.11               |
|                                      | Deafness                       | 706    | 2.32  | 2.32         | 0.14             | 1.14               |
|                                      | Ear pain                       | 1,852  | 2.05  | 2.05         | 0.17             | 1.15               |
| Eye disorders                        | Eye haemorrhage                | 146    | 4.83  | 4.83         | 0.08             | 1.15               |
|                                      | Blepharospasm                  | 308    | 3.48  | 3.48         | 0.14             | 1.17               |
|                                      | Vitreous floaters              | 289    | 3.27  | 3.27         | 0.12             | 1.16               |
|                                      | Asthenopia                     | 190    | 3.04  | 3.04         | 0.06             | 1.12               |
|                                      | Ocular discomfort              | 405    | 2.76  | 2.76         | 0.13             | 1.15               |
| Gastrointestinal disorders           | Gastrointestinal haemorrhage   | 181    | 8.39  | 8.39         | 0.17             | 1.21               |
|                                      | Tongue pruritus                | 286    | 5.30  | 5.30         | 0.19             | 1.21               |
|                                      | Paraesthesia oral              | 3,500  | 3.68  | 3.69         | 0.31             | 1.26               |
|                                      | Hypoaesthesia oral             | 2,491  | 3.68  | 3.68         | 0.30             | 1.26               |
|                                      | Tongue discomfort              | 292    | 3.38  | 3.38         | 0.13             | 1.16               |



| SOC                                                  | PT (n = 201)                          | Count  | PRR    | ROR           | IC <sub>LB</sub> | EBGM <sub>LB</sub> |
|------------------------------------------------------|---------------------------------------|--------|--------|---------------|------------------|--------------------|
|                                                      | Haematochezia                         | 263    | 2.97   | 2.97          | 0.10             | 1.14               |
|                                                      | Oral pruritus                         | 275    | 2.90   | 2.90          | 0.10             | 1.14               |
|                                                      | Tongue disorder                       | 259    | 2.86   | 2.86          | 0.09             | 1.13               |
|                                                      | Swollen tongue                        | 2,282  | 2.68   | 2.69          | 0.24             | 1.20               |
|                                                      | Abdominal pain lower                  | 375    | 2.56   | 2.56          | 0.11             | 1.13               |
|                                                      | Oral discomfort                       | 387    | 2.36   | 2.36          | 0.09             | 1.12               |
|                                                      | Gastrooesophageal reflux disease      | 368    | 2.30   | 2.30          | 0.08             | 1.11               |
|                                                      | Dyspepsia                             | 810    | 2.23   | 2.23          | 0.14             | 1.14               |
|                                                      | Dry mouth                             | 995    | 2.14   | 2.15          | 0.14             | 1.14               |
|                                                      | Abdominal distension                  | 781    | 2.10   | 2.10          | 0.12             | 1.13               |
|                                                      | Abdominal pain                        | 3,210  | 2.08   | 2.09          | 0.19             | 1.16               |
|                                                      | Mouth swelling                        | 453    | 2.06   | 2.06          | 0.07             | 1.10               |
|                                                      | Dysphagia                             | 2,453  | 2.05   | 2.05          | 0.18             | 1.15               |
| General disorders and administration site conditions | Disease recurrence                    | 189    | 87.57  | <b>87.58</b>  | 0.24             | 1.28               |
|                                                      | Vaccination site pruritus             | 596    | 16.24  | <b>16.25</b>  | 0.34             | 1.33               |
|                                                      | Drug ineffective                      | 754    | 15.19  | <b>15.20</b>  | 0.36             | 1.33               |
|                                                      | Facial discomfort                     | 133    | 6.85   | 6.85          | 0.10             | 1.17               |
|                                                      | Illness                               | 1,426  | 6.67   | 6.68          | 0.35             | 1.31               |
|                                                      | Death                                 | 4,033  | 5.82   | 5.84          | 0.38             | 1.32               |
|                                                      | General physical health deterioration | 350    | 5.79   | 5.79          | 0.22             | 1.23               |
|                                                      | Vaccination site mass                 | 381    | 5.19   | 5.19          | 0.22             | 1.23               |
|                                                      | Vaccination site erythema             | 1,073  | 5.07   | 5.08          | 0.30             | 1.27               |
|                                                      | Vaccination site pain                 | 5,135  | 4.76   | 4.78          | 0.36             | 1.30               |
|                                                      | Therapeutic response unexpected       | 187    | 3.94   | 3.94          | 0.09             | 1.15               |
|                                                      | Chest pain                            | 10,518 | 3.41   | 3.44          | 0.33             | 1.27               |
|                                                      | Chest discomfort                      | 7,688  | 3.38   | 3.40          | 0.32             | 1.26               |
|                                                      | Feeling jittery                       | 319    | 2.74   | 2.74          | 0.10             | 1.14               |
|                                                      | Condition aggravated                  | 6,965  | 2.59   | 2.60          | 0.27             | 1.22               |
|                                                      | Sensation of foreign body             | 561    | 2.18   | 2.18          | 0.11             | 1.12               |
|                                                      | Vaccination site rash                 | 380    | 2.10   | 2.10          | 0.06             | 1.10               |
| Immune system disorders                              | Immunodeficiency                      | 400    | 5.79   | 5.79          | 0.24             | 1.24               |
|                                                      | Anaphylactic reaction                 | 966    | 2.12   | 2.12          | 0.14             | 1.14               |
| Infections and infestations                          | Asymptomatic COVID-19                 | 588    | 136.21 | <b>136.29</b> | 0.38             | 1.36               |
|                                                      | COVID-19 pneumonia                    | 1,903  | 58.78  | <b>58.89</b>  | 0.45             | 1.40               |
|                                                      | Vaccine breakthrough infection        | 1,584  | 45.87  | <b>45.94</b>  | 0.43             | 1.39               |
|                                                      | COVID-19                              | 18,765 | 44.82  | <b>45.64</b>  | 0.51             | 1.43               |
|                                                      | Appendicitis                          | 406    | 20.90  | <b>20.91</b>  | 0.32             | 1.31               |
|                                                      | Suspected COVID-19                    | 209    | 10.76  | <b>10.76</b>  | 0.21             | 1.24               |
|                                                      | Ear infection                         | 195    | 3.93   | 3.93          | 0.10             | 1.15               |
|                                                      | Sinusitis                             | 466    | 2.57   | 2.57          | 0.13             | 1.15               |
|                                                      | Urinary tract infection               | 706    | 2.35   | 2.35          | 0.14             | 1.15               |
|                                                      | Sepsis                                | 536    | 2.24   | 2.24          | 0.11             | 1.13               |
|                                                      | Pneumonia                             | 1,446  | 2.21   | 2.21          | 0.17             | 1.16               |
| Metabolism and nutrition disorders                   | Hyperglycaemia                        | 148    | 5.71   | 5.71          | 0.10             | 1.17               |
|                                                      | Hypokalaemia                          | 144    | 4.77   | 4.77          | 0.08             | 1.15               |
|                                                      | Hyponatraemia                         | 333    | 4.68   | 4.68          | 0.19             | 1.21               |
|                                                      | Hypophagia                            | 353    | 2.77   | 2.77          | 0.12             | 1.14               |

| SOC                                             | PT (n = 201)               | Count | PRR   | ROR          | IC <sub>LB</sub> | EBGM <sub>LB</sub> |
|-------------------------------------------------|----------------------------|-------|-------|--------------|------------------|--------------------|
| Musculoskeletal and connective tissue disorders | Costochondritis            | 119   | 13.78 | <b>13.79</b> | 0.12             | 1.20               |
|                                                 | Axillary mass              | 461   | 2.43  | 2.43         | 0.12             | 1.13               |
|                                                 | Muscle twitching           | 1,164 | 2.07  | 2.08         | 0.15             | 1.14               |
| Nervous system disorders                        | Anosmia                    | 2,052 | 24.38 | <b>24.42</b> | 0.43             | 1.38               |
|                                                 | Cerebral infarction        | 171   | 13.20 | <b>13.21</b> | 0.19             | 1.23               |
|                                                 | Ageusia                    | 2,415 | 12.71 | <b>12.74</b> | 0.42             | 1.36               |
|                                                 | Taste disorder             | 943   | 7.80  | 7.81         | 0.34             | 1.31               |
|                                                 | Parosmia                   | 688   | 7.24  | 7.25         | 0.31             | 1.29               |
|                                                 | Electric shock sensation   | 390   | 7.23  | 7.23         | 0.26             | 1.26               |
|                                                 | Bell's palsy               | 1,659 | 6.99  | 7.00         | 0.36             | 1.32               |
|                                                 | Ischaemic stroke           | 192   | 5.93  | 5.93         | 0.15             | 1.19               |
|                                                 | Cerebrovascular accident   | 1,306 | 4.76  | 4.77         | 0.31             | 1.27               |
|                                                 | Cerebral haemorrhage       | 189   | 4.38  | 4.38         | 0.11             | 1.16               |
|                                                 | Dysgeusia                  | 2,273 | 3.71  | 3.71         | 0.30             | 1.26               |
|                                                 | Movement disorder          | 720   | 3.40  | 3.41         | 0.22             | 1.21               |
|                                                 | Transient ischaemic attack | 306   | 3.02  | 3.02         | 0.12             | 1.15               |
|                                                 | Head discomfort            | 1,457 | 2.97  | 2.98         | 0.24             | 1.21               |
|                                                 | Dizziness postural         | 322   | 2.71  | 2.71         | 0.10             | 1.13               |
|                                                 | Migraine                   | 3,990 | 2.70  | 2.71         | 0.26             | 1.22               |
|                                                 | Hemiparesis                | 403   | 2.63  | 2.63         | 0.12             | 1.14               |
|                                                 | Aphasia                    | 763   | 2.56  | 2.56         | 0.17             | 1.17               |
|                                                 | Cognitive disorder         | 390   | 2.54  | 2.55         | 0.11             | 1.13               |
|                                                 | Unresponsive to stimuli    | 1,811 | 2.45  | 2.45         | 0.21             | 1.18               |
|                                                 | Neurological symptom       | 311   | 2.36  | 2.36         | 0.07             | 1.11               |
|                                                 | Memory impairment          | 792   | 2.24  | 2.24         | 0.14             | 1.14               |
|                                                 | Dysarthria                 | 720   | 2.06  | 2.06         | 0.11             | 1.12               |
| Pregnancy, puerperium and perinatal conditions  | Abortion spontaneous       | 689   | 4.20  | 4.20         | 0.25             | 1.23               |
| Psychiatric disorders                           | Panic attack               | 635   | 3.98  | 3.98         | 0.23             | 1.22               |
|                                                 | Anxiety                    | 3,870 | 3.32  | 3.33         | 0.30             | 1.25               |
|                                                 | Mental status changes      | 623   | 3.10  | 3.10         | 0.19             | 1.19               |
|                                                 | Nervousness                | 1,004 | 2.45  | 2.45         | 0.18             | 1.17               |
|                                                 | Fear                       | 317   | 2.26  | 2.26         | 0.06             | 1.10               |
|                                                 | Depression                 | 543   | 2.11  | 2.11         | 0.10             | 1.12               |
|                                                 |                            |       |       |              |                  |                    |
| Renal and urinary disorders                     | Chronic kidney disease     | 137   | 10.58 | <b>10.58</b> | 0.14             | 1.20               |
|                                                 | Acute kidney injury        | 1,052 | 10.15 | <b>10.16</b> | 0.36             | 1.33               |
|                                                 | Haematuria                 | 181   | 3.65  | 3.65         | 0.08             | 1.14               |
|                                                 | Renal failure              | 184   | 3.55  | 3.55         | 0.08             | 1.14               |
|                                                 | Dysuria                    | 293   | 2.30  | 2.30         | 0.06             | 1.10               |
| Reproductive system and breast disorders        | Oligomenorrhoea            | 328   | 50.66 | <b>50.67</b> | 0.31             | 1.32               |
|                                                 | Premenstrual syndrome      | 88    | 40.77 | <b>40.78</b> | 0.09             | 1.19               |
|                                                 | Postmenopausal haemorrhage | 288   | 33.36 | <b>33.37</b> | 0.29             | 1.30               |
|                                                 | Menstruation delayed       | 654   | 30.30 | <b>30.32</b> | 0.37             | 1.35               |
|                                                 | Dysmenorrhoea              | 1,110 | 28.57 | <b>28.60</b> | 0.40             | 1.37               |
|                                                 | Polymenorrhoea             | 408   | 27.00 | <b>27.02</b> | 0.32             | 1.32               |
|                                                 | Hypomenorrhoea             | 106   | 24.56 | <b>24.56</b> | 0.12             | 1.20               |
|                                                 | Intermenstrual bleeding    | 829   | 24.01 | <b>24.02</b> | 0.38             | 1.35               |
|                                                 | Heavy menstrual bleeding   | 2,604 | 21.17 | <b>21.22</b> | 0.44             | 1.39               |
|                                                 | Menstruation irregular     | 1,935 | 20.38 | <b>20.41</b> | 0.43             | 1.38               |
|                                                 | Menstrual disorder         | 1,464 | 17.85 | <b>17.87</b> | 0.41             | 1.36               |
|                                                 |                            |       |       |              |                  |                    |

| SOC                                                | PT (n = 201)                             | Count  | PRR   | ROR          | IC <sub>LB</sub> | EBGM <sub>LB</sub> |
|----------------------------------------------------|------------------------------------------|--------|-------|--------------|------------------|--------------------|
|                                                    | Breast mass                              | 218    | 10.10 | <b>10.10</b> | 0.21             | 1.24               |
|                                                    | Vaginal haemorrhage                      | 936    | 10.09 | <b>10.09</b> | 0.35             | 1.32               |
|                                                    | Breast tenderness                        | 268    | 6.21  | 6.21         | 0.20             | 1.22               |
|                                                    | Amenorrhoea                              | 374    | 4.81  | 4.81         | 0.21             | 1.22               |
|                                                    | Breast swelling                          | 388    | 3.52  | 3.53         | 0.17             | 1.18               |
|                                                    | Pelvic pain                              | 198    | 3.06  | 3.06         | 0.06             | 1.12               |
|                                                    | Breast pain                              | 994    | 2.69  | 2.69         | 0.20             | 1.18               |
| Respiratory, thoracic and<br>mediastinal disorders | Acute respiratory failure                | 1,120  | 34.59 | <b>34.63</b> | 0.41             | 1.37               |
|                                                    | Lung opacity                             | 786    | 33.11 | <b>33.13</b> | 0.38             | 1.36               |
|                                                    | Lung consolidation                       | 125    | 14.48 | <b>14.48</b> | 0.13             | 1.21               |
|                                                    | Hypoxia                                  | 1,358  | 13.68 | <b>13.69</b> | 0.39             | 1.35               |
|                                                    | Pulmonary embolism                       | 1,421  | 11.97 | <b>11.99</b> | 0.39             | 1.35               |
|                                                    | Atelectasis                              | 277    | 11.67 | <b>11.67</b> | 0.25             | 1.27               |
|                                                    | Throat clearing                          | 201    | 9.31  | 9.31         | 0.19             | 1.23               |
|                                                    | Lung infiltration                        | 423    | 8.52  | 8.52         | 0.28             | 1.28               |
|                                                    | Pulmonary mass                           | 159    | 7.37  | 7.37         | 0.14             | 1.19               |
|                                                    | Pulmonary thrombosis                     | 269    | 6.92  | 6.93         | 0.21             | 1.23               |
|                                                    | Pleural effusion                         | 420    | 6.28  | 6.28         | 0.25             | 1.25               |
|                                                    | Chronic obstructive pulmonary<br>disease | 261    | 5.76  | 5.76         | 0.19             | 1.22               |
|                                                    | Oropharyngeal discomfort                 | 692    | 5.62  | 5.63         | 0.28             | 1.27               |
|                                                    | Pharyngeal paraesthesia                  | 522    | 5.15  | 5.15         | 0.25             | 1.24               |
|                                                    | Dyspnoea exertional                      | 774    | 4.91  | 4.92         | 0.28             | 1.26               |
|                                                    | Pulmonary oedema                         | 245    | 4.73  | 4.73         | 0.16             | 1.19               |
|                                                    | Lung disorder                            | 236    | 4.21  | 4.21         | 0.14             | 1.18               |
|                                                    | Epistaxis                                | 1,013  | 3.91  | 3.91         | 0.26             | 1.24               |
|                                                    | Pharyngeal hypoaesthesia                 | 259    | 3.87  | 3.87         | 0.14             | 1.17               |
|                                                    | Hyperventilation                         | 359    | 3.78  | 3.78         | 0.17             | 1.19               |
|                                                    | Paranasal sinus discomfort               | 439    | 3.77  | 3.77         | 0.19             | 1.20               |
|                                                    | Haemoptysis                              | 192    | 3.71  | 3.71         | 0.09             | 1.15               |
|                                                    | Tachypnoea                               | 283    | 3.64  | 3.64         | 0.14             | 1.17               |
|                                                    | Respiratory distress                     | 308    | 3.40  | 3.40         | 0.14             | 1.17               |
|                                                    | Pulmonary pain                           | 247    | 3.18  | 3.18         | 0.10             | 1.14               |
|                                                    | Pulmonary congestion                     | 233    | 3.18  | 3.18         | 0.09             | 1.14               |
|                                                    | Nasal congestion                         | 2,714  | 3.14  | 3.15         | 0.28             | 1.23               |
|                                                    | Pharyngeal swelling                      | 2,145  | 3.14  | 3.14         | 0.27             | 1.23               |
|                                                    | Respiratory failure                      | 365    | 3.13  | 3.13         | 0.14             | 1.16               |
|                                                    | Cough                                    | 11,386 | 3.00  | 3.02         | 0.31             | 1.25               |
|                                                    | Sinus congestion                         | 614    | 2.99  | 3.00         | 0.18             | 1.18               |
|                                                    | Respiratory tract congestion             | 2,132  | 2.91  | 2.92         | 0.25             | 1.22               |
|                                                    | Upper-airway cough syndrome              | 317    | 2.88  | 2.88         | 0.11             | 1.14               |
|                                                    | Rhinorrhoea                              | 3,438  | 2.81  | 2.82         | 0.26             | 1.22               |
|                                                    | Dyspnoea                                 | 19,740 | 2.72  | 2.75         | 0.29             | 1.24               |
|                                                    | Dry throat                               | 439    | 2.71  | 2.71         | 0.13             | 1.15               |
|                                                    | Throat tightness                         | 3,399  | 2.56  | 2.56         | 0.24             | 1.20               |
|                                                    | Throat irritation                        | 3,123  | 2.50  | 2.51         | 0.24             | 1.20               |
|                                                    | Sneezing                                 | 911    | 2.37  | 2.37         | 0.16             | 1.16               |
|                                                    | Productive cough                         | 917    | 2.22  | 2.23         | 0.15             | 1.15               |
|                                                    | Asthma                                   | 689    | 2.11  | 2.11         | 0.12             | 1.12               |
|                                                    | Oropharyngeal pain                       | 5,642  | 2.08  | 2.09         | 0.21             | 1.17               |

| SOC                                    | PT (n = 201)                | Count | PRR   | ROR          | IC <sub>LB</sub> | EBGM <sub>LB</sub> |
|----------------------------------------|-----------------------------|-------|-------|--------------|------------------|--------------------|
| Skin and subcutaneous tissue disorders | Alopecia                    | 564   | 2.18  | 2.18         | 0.11             | 1.12               |
|                                        | Superficial vein thrombosis | 124   | 57.45 | <b>57.46</b> | 0.16             | 1.23               |
| Vascular disorders                     | Deep vein thrombosis        | 1,012 | 13.02 | <b>13.04</b> | 0.37             | 1.34               |
|                                        | Thrombosis                  | 1,582 | 8.24  | 8.25         | 0.37             | 1.33               |
|                                        | Hypertension                | 3,051 | 3.83  | 3.84         | 0.31             | 1.27               |
|                                        | Blood pressure fluctuation  | 177   | 3.73  | 3.73         | 0.08             | 1.14               |
|                                        | Hot flush                   | 1,731 | 2.83  | 2.84         | 0.24             | 1.21               |
|                                        | Flushing                    | 4,370 | 2.61  | 2.62         | 0.25             | 1.21               |
|                                        | Hypotension                 | 1,746 | 2.01  | 2.01         | 0.16             | 1.14               |

SOC= system organ class; PT= preferred term; PRR = proportional reporting ratio; ROR = reporting odd ratio; IC<sub>LB</sub> = lower bound of information component 95% confidence interval; EBGM<sub>LB</sub> = lower bound of empirical bayesian geometric mean 95% confidence interval

Table S6. Signals detected in adverse events after administration of Moderna (mRNA-1273).

| SOC                                                  | PT (n = 110)                          | Count | PRR   | ROR          | IC <sub>LB</sub> | EBGM <sub>LB</sub> |
|------------------------------------------------------|---------------------------------------|-------|-------|--------------|------------------|--------------------|
| Blood and lymphatic system disorders                 | Lymphadenopathy                       | 8,683 | 2.54  | 2.56         | 0.24             | 1.20               |
|                                                      | Lymph node pain                       | 2,035 | 2.10  | 2.10         | 0.16             | 1.14               |
| Cardiac disorders                                    | Acute myocardial infarction           | 366   | 8.45  | 8.45         | 0.22             | 1.23               |
|                                                      | Cardiomegaly                          | 236   | 6.13  | 6.13         | 0.14             | 1.18               |
|                                                      | Cardiac flutter                       | 478   | 5.68  | 5.68         | 0.22             | 1.22               |
|                                                      | Myocardial infarction                 | 582   | 4.74  | 4.75         | 0.21             | 1.21               |
|                                                      | Cardiac failure congestive            | 296   | 4.56  | 4.56         | 0.14             | 1.17               |
|                                                      | Supraventricular tachycardia          | 194   | 4.24  | 4.25         | 0.08             | 1.14               |
|                                                      | Cardiac failure                       | 181   | 3.96  | 3.96         | 0.06             | 1.12               |
|                                                      | Extrasystoles                         | 194   | 3.84  | 3.84         | 0.06             | 1.13               |
|                                                      | Cardiac disorder                      | 275   | 3.81  | 3.81         | 0.11             | 1.15               |
|                                                      | Ventricular extrasystoles             | 366   | 3.80  | 3.80         | 0.14             | 1.17               |
|                                                      | Atrial fibrillation                   | 1,232 | 3.68  | 3.69         | 0.23             | 1.21               |
|                                                      | Sinus tachycardia                     | 223   | 3.57  | 3.57         | 0.07             | 1.13               |
|                                                      | Angina pectoris                       | 305   | 3.52  | 3.52         | 0.11             | 1.15               |
|                                                      | Cardiac arrest                        | 433   | 3.46  | 3.46         | 0.15             | 1.16               |
|                                                      | Pericardial effusion                  | 241   | 3.23  | 3.23         | 0.07             | 1.12               |
|                                                      | Myocarditis                           | 761   | 2.82  | 2.83         | 0.16             | 1.16               |
|                                                      | Palpitations                          | 5,692 | 2.75  | 2.76         | 0.25             | 1.20               |
|                                                      | Pericarditis                          | 612   | 2.74  | 2.74         | 0.14             | 1.15               |
|                                                      | Tachycardia                           | 2,451 | 2.70  | 2.71         | 0.22             | 1.19               |
| Ear and labyrinth disorders                          | Tinnitus                              | 5,295 | 2.90  | 2.91         | 0.25             | 1.21               |
|                                                      | Ear discomfort                        | 994   | 2.79  | 2.79         | 0.18             | 1.17               |
|                                                      | Vertigo                               | 3,226 | 2.01  | 2.01         | 0.16             | 1.14               |
| Eye disorders                                        | Ocular discomfort                     | 369   | 2.26  | 2.26         | 0.05             | 1.09               |
| Gastrointestinal disorders                           | Paraesthesia oral                     | 2,623 | 2.47  | 2.48         | 0.20             | 1.17               |
|                                                      | Hypoaesthesia oral                    | 1,864 | 2.47  | 2.47         | 0.19             | 1.17               |
| General disorders and administration site conditions | Vaccination site pruritus             | 2,929 | 71.62 | <b>71.80</b> | 0.42             | 1.36               |
|                                                      | Vaccination site urticaria            | 226   | 46.97 | <b>46.98</b> | 0.21             | 1.25               |
|                                                      | Vaccination site erythema             | 4,343 | 18.42 | <b>18.49</b> | 0.41             | 1.35               |
|                                                      | Vaccination site rash                 | 1,913 | 9.47  | 9.48         | 0.35             | 1.30               |
|                                                      | Vaccination site mass                 | 673   | 8.23  | 8.23         | 0.28             | 1.26               |
|                                                      | Illness                               | 1,903 | 7.99  | 8.00         | 0.34             | 1.29               |
|                                                      | Vaccination site movement impairment  | 229   | 7.93  | 7.93         | 0.16             | 1.20               |
|                                                      | Facial discomfort                     | 132   | 6.10  | 6.10         | 0.05             | 1.13               |
|                                                      | Vaccination site pain                 | 7,138 | 5.93  | 5.97         | 0.36             | 1.30               |
|                                                      | Vaccination site induration           | 969   | 5.52  | 5.52         | 0.27             | 1.25               |
|                                                      | Vaccination site discolouration       | 232   | 5.36  | 5.36         | 0.13             | 1.17               |
|                                                      | Death                                 | 3,685 | 4.77  | 4.78         | 0.32             | 1.27               |
|                                                      | General physical health deterioration | 283   | 4.20  | 4.20         | 0.13             | 1.16               |
|                                                      | Vaccination site reaction             | 916   | 4.05  | 4.05         | 0.23             | 1.21               |
|                                                      | Therapeutic response unexpected       | 204   | 3.85  | 3.86         | 0.07             | 1.13               |
|                                                      | Vaccination site warmth               | 2,454 | 3.57  | 3.57         | 0.26             | 1.23               |
|                                                      | Vaccination site swelling             | 3,387 | 3.27  | 3.27         | 0.26             | 1.22               |
|                                                      | Chest pain                            | 7,751 | 2.26  | 2.27         | 0.21             | 1.17               |

| SOC                                             | PT (n = 110)                   | Count  | PRR   | ROR          | IC <sub>LB</sub> | EBGM <sub>LB</sub> |
|-------------------------------------------------|--------------------------------|--------|-------|--------------|------------------|--------------------|
| Infections and infestations                     | Chest discomfort               | 5,624  | 2.22  | 2.22         | 0.20             | 1.17               |
|                                                 | Asymptomatic COVID-19          | 320    | 66.51 | <b>66.53</b> | 0.26             | 1.28               |
|                                                 | COVID-19 pneumonia             | 1,123  | 31.12 | <b>31.15</b> | 0.36             | 1.33               |
|                                                 | COVID-19                       | 11,848 | 25.39 | <b>25.64</b> | 0.44             | 1.37               |
|                                                 | Vaccine breakthrough infection | 925    | 24.03 | <b>24.05</b> | 0.34             | 1.32               |
|                                                 | Post-acute COVID-19 syndrome   | 215    | 12.77 | <b>12.77</b> | 0.18             | 1.22               |
|                                                 | Appendicitis                   | 206    | 9.51  | 9.52         | 0.16             | 1.20               |
|                                                 | Urinary tract infection        | 775    | 2.32  | 2.32         | 0.12             | 1.13               |
|                                                 | Sinusitis                      | 448    | 2.22  | 2.22         | 0.07             | 1.10               |
| Nervous system disorders                        | Anosmia                        | 1,400  | 14.92 | <b>14.94</b> | 0.35             | 1.32               |
|                                                 | Ageusia                        | 1,877  | 8.87  | 8.88         | 0.34             | 1.30               |
|                                                 | Taste disorder                 | 938    | 6.96  | 6.97         | 0.29             | 1.26               |
|                                                 | Bell's palsy                   | 1,380  | 5.22  | 5.22         | 0.28             | 1.25               |
|                                                 | Electric shock sensation       | 301    | 5.01  | 5.01         | 0.15             | 1.18               |
|                                                 | Parosmia                       | 521    | 4.92  | 4.92         | 0.21             | 1.21               |
|                                                 | Cerebrovascular accident       | 1,267  | 4.15  | 4.15         | 0.25             | 1.23               |
|                                                 | Movement disorder              | 687    | 2.91  | 2.92         | 0.16             | 1.16               |
|                                                 | Dysgeusia                      | 1,649  | 2.41  | 2.42         | 0.18             | 1.16               |
|                                                 | Hypokinesia                    | 414    | 2.33  | 2.33         | 0.07             | 1.10               |
|                                                 | Migraine                       | 3,612  | 2.19  | 2.20         | 0.19             | 1.16               |
|                                                 | Aphasia                        | 727    | 2.19  | 2.19         | 0.11             | 1.12               |
|                                                 | Head discomfort                | 1,148  | 2.10  | 2.10         | 0.13             | 1.12               |
| Pregnancy, puerperium and perinatal conditions  | Abortion spontaneous           | 420    | 2.30  | 2.30         | 0.07             | 1.10               |
| Psychiatric disorders                           | Panic attack                   | 459    | 2.58  | 2.58         | 0.10             | 1.13               |
|                                                 | Mental status changes          | 528    | 2.36  | 2.36         | 0.10             | 1.12               |
|                                                 | Anxiety                        | 2,882  | 2.22  | 2.22         | 0.18             | 1.16               |
| Renal and urinary disorders                     | Acute kidney injury            | 643    | 5.57  | 5.57         | 0.24             | 1.23               |
| Reproductive system and breast disorders        | Oligomenorrhoea                | 199    | 27.57 | <b>27.58</b> | 0.19             | 1.23               |
|                                                 | Postmenopausal haemorrhage     | 184    | 19.12 | <b>19.13</b> | 0.17             | 1.22               |
|                                                 | Menstruation delayed           | 385    | 16.00 | <b>16.01</b> | 0.26             | 1.26               |
|                                                 | Dysmenorrhoea                  | 624    | 14.41 | <b>14.42</b> | 0.30             | 1.28               |
|                                                 | Polymenorrhoea                 | 218    | 12.95 | <b>12.95</b> | 0.18             | 1.22               |
|                                                 | Intermenstrual bleeding        | 465    | 12.08 | <b>12.09</b> | 0.26             | 1.26               |
|                                                 | Heavy menstrual bleeding       | 1,487  | 10.84 | <b>10.86</b> | 0.34             | 1.30               |
|                                                 | Menstruation irregular         | 1,097  | 10.36 | <b>10.37</b> | 0.32             | 1.29               |
|                                                 | Menstrual disorder             | 827    | 9.05  | 9.05         | 0.30             | 1.28               |
|                                                 | Breast mass                    | 145    | 6.03  | 6.03         | 0.07             | 1.14               |
|                                                 | Vaginal haemorrhage            | 514    | 4.97  | 4.97         | 0.21             | 1.21               |
|                                                 | Breast tenderness              | 211    | 4.39  | 4.39         | 0.09             | 1.15               |
| Respiratory, thoracic and mediastinal disorders | Acute respiratory failure      | 727    | 20.15 | <b>20.16</b> | 0.32             | 1.30               |
|                                                 | Lung opacity                   | 489    | 18.48 | <b>18.49</b> | 0.29             | 1.28               |
|                                                 | Pulmonary embolism             | 1,308  | 9.89  | 9.90         | 0.33             | 1.30               |
|                                                 | Hypoxia                        | 1,049  | 9.48  | 9.49         | 0.32             | 1.29               |
|                                                 | Atelectasis                    | 198    | 7.48  | 7.48         | 0.13             | 1.18               |
|                                                 | Throat clearing                | 157    | 6.53  | 6.53         | 0.09             | 1.15               |
|                                                 | Lung infiltration              | 332    | 6.00  | 6.00         | 0.18             | 1.20               |
|                                                 | Pulmonary thrombosis           | 250    | 5.77  | 5.77         | 0.15             | 1.18               |
|                                                 | Oropharyngeal discomfort       | 607    | 4.43  | 4.43         | 0.21             | 1.21               |

| SOC                                    | PT (n = 110)                          | Count  | PRR   | ROR          | IC <sub>LB</sub> | EBGM <sub>LB</sub> |
|----------------------------------------|---------------------------------------|--------|-------|--------------|------------------|--------------------|
|                                        | Chronic obstructive pulmonary disease | 219    | 4.34  | 4.34         | 0.10             | 1.15               |
|                                        | Pleural effusion                      | 322    | 4.32  | 4.32         | 0.15             | 1.17               |
|                                        | Pulmonary oedema                      | 228    | 3.95  | 3.95         | 0.09             | 1.14               |
|                                        | Pharyngeal paraesthesia               | 355    | 3.14  | 3.14         | 0.11             | 1.14               |
|                                        | Dyspnoea exertional                   | 537    | 3.06  | 3.06         | 0.15             | 1.16               |
|                                        | Tachypnoea                            | 253    | 2.92  | 2.92         | 0.06             | 1.11               |
|                                        | Epistaxis                             | 829    | 2.87  | 2.87         | 0.17             | 1.17               |
|                                        | Paranasal sinus discomfort            | 329    | 2.53  | 2.53         | 0.06             | 1.11               |
|                                        | Pharyngeal swelling                   | 1,748  | 2.29  | 2.29         | 0.17             | 1.15               |
|                                        | Dyspnoea                              | 16,455 | 2.03  | 2.05         | 0.20             | 1.16               |
|                                        | Nasal congestion                      | 1,957  | 2.03  | 2.04         | 0.15             | 1.13               |
| Skin and subcutaneous tissue disorders | Mechanical urticaria                  | 268    | 15.92 | <b>15.92</b> | 0.21             | 1.24               |
|                                        | Skin swelling                         | 414    | 2.65  | 2.65         | 0.10             | 1.12               |
| Vascular disorders                     | Deep vein thrombosis                  | 934    | 10.79 | <b>10.79</b> | 0.32             | 1.29               |
|                                        | Thrombosis                            | 1,198  | 5.60  | 5.60         | 0.28             | 1.25               |
|                                        | Hypertension                          | 2,606  | 2.94  | 2.94         | 0.23             | 1.20               |
|                                        | Hot flush                             | 1,512  | 2.22  | 2.22         | 0.15             | 1.14               |

SOC= system organ class; PT= preferred term; PRR = proportional reporting ratio; ROR = reporting odd ratio; IC<sub>LB</sub> = lower bound of information component 95% confidence interval; EBGM<sub>LB</sub> = lower bound of empirical bayesian geometric mean 95% confidence interval

**Table S7. Signals detected from serious adverse events after administration of Pfizer-BioNTech (BNT162b2).**

| SOC                                                  | PT (n = 28)                           | Count | PRR    | ROR           | IC <sub>LB</sub> | EBGM <sub>LB</sub> |
|------------------------------------------------------|---------------------------------------|-------|--------|---------------|------------------|--------------------|
| Cardiac disorders                                    | Acute myocardial infarction           | 467   | 10.72  | <b>10.75</b>  | 0.15             | 1.17               |
|                                                      | Myocardial infarction                 | 526   | 3.83   | 3.84          | 0.09             | 1.12               |
|                                                      | Atrial fibrillation                   | 814   | 3.52   | 3.54          | 0.12             | 1.13               |
|                                                      | Cardiac arrest                        | 510   | 3.17   | 3.18          | 0.07             | 1.10               |
| General disorders and administration site conditions | Death                                 | 4,021 | 3.79   | 3.86          | 0.21             | 1.17               |
|                                                      | Unevaluable event                     | 943   | 3.52   | 3.53          | 0.13             | 1.13               |
|                                                      | Condition aggravated                  | 2,200 | 2.52   | 2.54          | 0.13             | 1.12               |
|                                                      | Chest pain                            | 2,439 | 2.09   | 2.11          | 0.11             | 1.10               |
| Infections and infestations                          | Vaccine breakthrough infection        | 1,155 | 114.93 | <b>115.81</b> | 0.25             | 1.23               |
|                                                      | COVID-19                              | 8,628 | 37.33  | <b>39.54</b>  | 0.32             | 1.27               |
|                                                      | COVID-19 pneumonia                    | 1,831 | 39.04  | <b>39.51</b>  | 0.27             | 1.24               |
|                                                      | Asymptomatic COVID-19                 | 256   | 38.21  | <b>38.28</b>  | 0.11             | 1.16               |
|                                                      | Appendicitis                          | 354   | 17.61  | <b>17.65</b>  | 0.14             | 1.16               |
| Nervous system disorders                             | Cerebrovascular accident              | 1,139 | 3.47   | 3.49          | 0.14             | 1.14               |
| Renal and urinary disorders                          | Acute kidney injury                   | 1,001 | 7.47   | 7.51          | 0.19             | 1.18               |
| Respiratory, thoracic and mediastinal disorders      | Lung opacity                          | 748   | 22.33  | <b>22.44</b>  | 0.21             | 1.20               |
|                                                      | Acute respiratory failure             | 1,100 | 21.89  | <b>22.05</b>  | 0.24             | 1.22               |
|                                                      | Chronic obstructive pulmonary disease | 217   | 10.80  | <b>10.81</b>  | 0.06             | 1.12               |
|                                                      | Atelectasis                           | 233   | 9.94   | 9.95          | 0.07             | 1.12               |
|                                                      | Hypoxia                               | 1,280 | 9.10   | 9.17          | 0.22             | 1.20               |
|                                                      | Pulmonary embolism                    | 1,237 | 8.21   | 8.27          | 0.21             | 1.19               |
|                                                      | Lung infiltration                     | 408   | 6.09   | 6.10          | 0.11             | 1.14               |
|                                                      | Pleural effusion                      | 359   | 4.87   | 4.88          | 0.08             | 1.12               |
|                                                      | Cough                                 | 3,093 | 4.33   | 4.40          | 0.21             | 1.18               |
|                                                      | Dyspnoea exertional                   | 468   | 4.23   | 4.24          | 0.09             | 1.12               |
|                                                      | Dyspnoea                              | 6,042 | 2.47   | 2.53          | 0.16             | 1.13               |
|                                                      | Deep vein thrombosis                  | 603   | 6.92   | 6.95          | 0.15             | 1.16               |
| Vascular disorders                                   | Thrombosis                            | 645   | 3.93   | 3.94          | 0.11             | 1.13               |

SOC= system organ class; PT= preferred term; PRR = proportional reporting ratio; ROR = reporting odd ratio; IC<sub>LB</sub> = lower bound of information component 95% confidence interval; EBGM<sub>LB</sub> = lower bound of empirical bayesian geometric mean 95% confidence interval



**Table S8.** Signals detected from serious adverse events after administration of Moderna (mRNA-1273).

| SOC                                                  | PT (n=37)                             | Count | PRR   | ROR          | IC <sub>LB</sub> | EBGM <sub>LB</sub> |
|------------------------------------------------------|---------------------------------------|-------|-------|--------------|------------------|--------------------|
| Cardiac disorders                                    | Acute myocardial infarction           | 358   | 10.24 | <b>10.27</b> | 0.19             | 1.21               |
|                                                      | Cardiomegaly                          | 190   | 7.07  | 7.08         | 0.09             | 1.15               |
|                                                      | Cardiac failure congestive            | 265   | 4.93  | 4.94         | 0.10             | 1.15               |
|                                                      | Myocardial infarction                 | 500   | 4.54  | 4.55         | 0.16             | 1.17               |
|                                                      | Atrial fibrillation                   | 703   | 3.79  | 3.81         | 0.17             | 1.17               |
|                                                      | Cardiac arrest                        | 422   | 3.27  | 3.28         | 0.11             | 1.13               |
|                                                      | Myocarditis                           | 547   | 2.14  | 2.15         | 0.06             | 1.09               |
| General disorders and administration site conditions | Death                                 | 3,673 | 4.31  | 4.41         | 0.27             | 1.23               |
|                                                      | General physical health deterioration | 257   | 3.98  | 3.99         | 0.08             | 1.13               |
|                                                      | Unevaluable event                     | 703   | 3.27  | 3.28         | 0.15             | 1.16               |
|                                                      | Condition aggravated                  | 1,727 | 2.46  | 2.48         | 0.16             | 1.14               |
|                                                      | Chest pain                            | 1,894 | 2.02  | 2.04         | 0.12             | 1.12               |
| Infections and infestations                          | Vaccine breakthrough infection        | 667   | 82.69 | <b>83.14</b> | 0.29             | 1.28               |
|                                                      | COVID-19                              | 5,515 | 29.72 | <b>31.10</b> | 0.38             | 1.32               |
|                                                      | Asymptomatic COVID-19                 | 159   | 29.57 | <b>29.60</b> | 0.11             | 1.18               |
|                                                      | COVID-19 pneumonia                    | 1,076 | 28.58 | <b>28.83</b> | 0.31             | 1.29               |
|                                                      | Appendicitis                          | 167   | 10.35 | <b>10.36</b> | 0.09             | 1.15               |
|                                                      | Urinary tract infection               | 344   | 3.20  | 3.20         | 0.08             | 1.12               |
|                                                      | Pneumonia                             | 950   | 2.10  | 2.11         | 0.10             | 1.10               |
| Nervous system disorders                             | Cerebrovascular accident              | 1,091 | 4.14  | 4.17         | 0.21             | 1.20               |
|                                                      | Unresponsive to stimuli               | 491   | 2.34  | 2.35         | 0.07             | 1.10               |
| Psychiatric disorders                                | Mental status changes                 | 439   | 2.44  | 2.44         | 0.06             | 1.10               |
| Renal and urinary disorders                          | Acute kidney injury                   | 620   | 5.76  | 5.79         | 0.21             | 1.20               |
| Respiratory, thoracic and mediastinal disorders      | Acute respiratory failure             | 724   | 17.95 | <b>18.05</b> | 0.28             | 1.26               |
|                                                      | Lung opacity                          | 468   | 17.40 | <b>17.47</b> | 0.24             | 1.24               |
|                                                      | Chronic obstructive pulmonary disease | 171   | 10.60 | <b>10.61</b> | 0.09             | 1.16               |
|                                                      | Pulmonary embolism                    | 1,159 | 9.58  | 9.66         | 0.28             | 1.26               |
|                                                      | Atelectasis                           | 174   | 9.24  | 9.26         | 0.09             | 1.15               |
|                                                      | Hypoxia                               | 979   | 8.67  | 8.73         | 0.27             | 1.25               |
|                                                      | Lung infiltration                     | 318   | 5.91  | 5.93         | 0.14             | 1.17               |
|                                                      | Pulmonary thrombosis                  | 232   | 5.39  | 5.40         | 0.09             | 1.14               |
|                                                      | Pleural effusion                      | 281   | 4.75  | 4.76         | 0.11             | 1.15               |
|                                                      | Dyspnoea exertional                   | 329   | 3.71  | 3.72         | 0.10             | 1.13               |
|                                                      | Cough                                 | 1,946 | 3.40  | 3.44         | 0.22             | 1.19               |
|                                                      | Dyspnoea                              | 4,710 | 2.40  | 2.46         | 0.19             | 1.16               |
| Vascular disorders                                   | Deep vein thrombosis                  | 544   | 7.78  | 7.81         | 0.22             | 1.22               |
|                                                      | Thrombosis                            | 510   | 3.87  | 3.88         | 0.15             | 1.16               |

SOC= system organ class; PT= preferred term; PRR = proportional reporting ratio; ROR = reporting odd ratio; IC<sub>LB</sub> = lower bound of information component 95% confidence interval; EBGM<sub>LB</sub> = lower bound of empirical bayesian geometric mean 95% confidence interval

**Table S9.** Area under the receiver operating characteristic curve (AUROC) with various numbers of selected features in major signals of AEFIs.

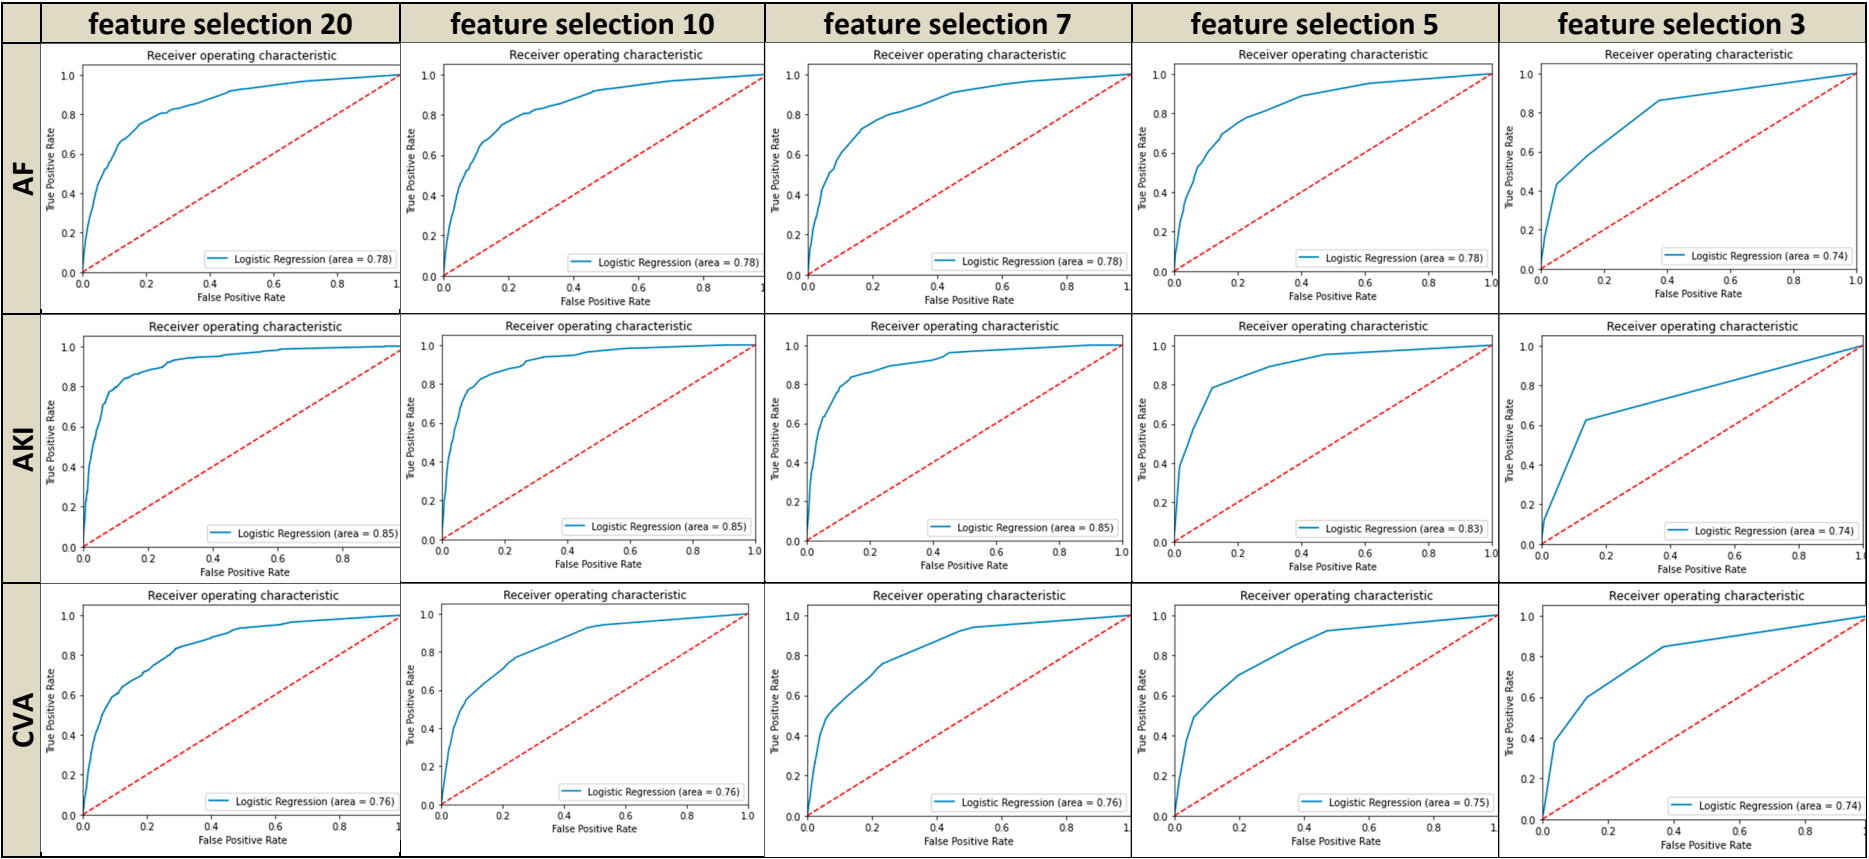

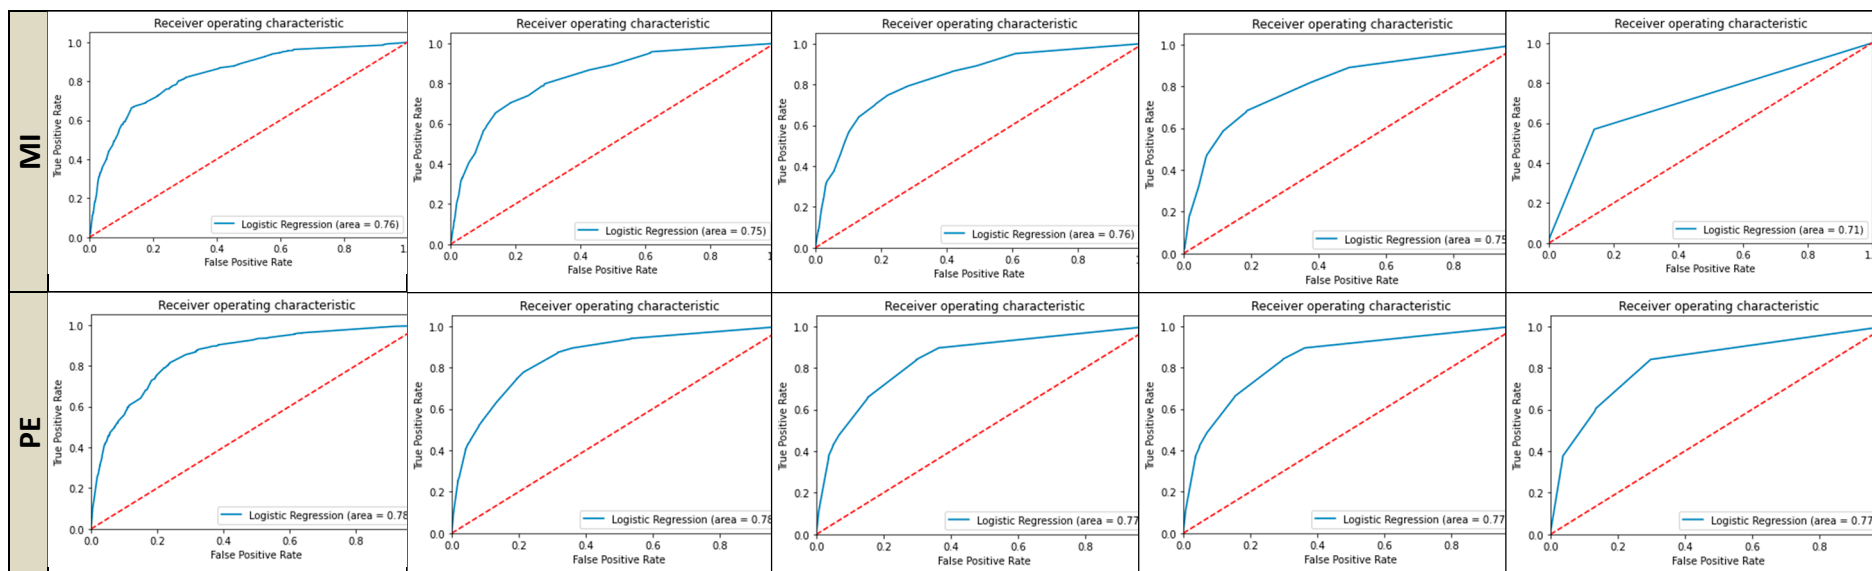

(days).
